# Supplementary material for: Periodismo y literatura, una muestra de sus concomitancias en el discurso
Source: MDPI journal article supplement (doi:10.3390/jcm10235506), 2001-01-01

**Supplemental Material includes:**

Search strategy

Figure legends for Figures from S1 to S2

Table S1 to S3

Figures S1 to S2

This supplementary material has been provided by the authors to give readers additional information about their work.

## Search strategy

### PUBMED

("Dual antiplatelet therapy"[tiab] OR "DAPT"[tiab] OR "P2Y12 inhibitor"[tiab] OR "ticagrelor"[tiab]) AND ("coronary artery disease"[tiab] OR "CAD"[tiab] OR "chronic ischemic heart disease"[tiab] OR "angina"[tiab] OR "acute coronary syndrome"[tiab] OR "myocardial infarction"[tiab] OR "percutaneous coronary intervention" [tiab] OR "PCI"[tiab] OR "angioplasty"[tiab] OR "drug eluting stent"[tiab] OR "DES"[tiab])

### EMBASE

((('Dual antiplatelet therapy':ti,ab OR 'DAPT':ti,ab OR 'P2Y12 inhibitor':ti,ab OR 'ticagrelor':ti,ab) AND ('coronary artery disease':ti,ab OR 'CAD':ti,ab OR 'chronic ischemic heart disease':ti,ab OR 'angina':ti,ab OR 'acute coronary syndrome':ti,ab OR 'myocardial infarction':ti,ab OR 'percutaneous coronary intervention':ti,ab OR 'PCI':ti,ab OR 'angioplasty':ti,ab OR 'drug eluting stent':ti,ab OR 'DES':ti,ab))

### COCHRANE

("Dual antiplatelet therapy" OR "DAPT" OR "P2Y12 inhibitor" OR "ticagrelor") AND ("coronary artery disease" OR "CAD" OR "chronic ischemic heart disease" OR "angina" OR "acute coronary syndrome" OR "myocardial infarction" OR "percutaneous coronary intervention" OR "PCI" OR "angioplasty" OR "drug eluting stent" OR "DES")

## Figure legends

**Figure S1:** Risk of bias assessment by Rob2 tool for randomized controlled trials.

**Figure S2:** Funnel plots for the pooled analysis of studies comparing ticagrelor monotherapy after short dual antiplatelet therapy versus standard dual antiplatelet therapy in complex percutaneous coronary interventions for the endpoint of myocardial infarction, ischemic stroke, stent thrombosis, cardiovascular death, all-cause death, major bleeding, any bleeding

**Table S1:** Key study characteristics

| Study                           | GLOBAL LEADERS                                                                                                                                                                                                                                                                                                                 |                                                                                                                              | TWILIGHT                                                                                                                                                                                                                                                                                                                                                                                                                                                                                                            |                                | TICO                                                                                                                                                                                                                        |                                |
|---------------------------------|--------------------------------------------------------------------------------------------------------------------------------------------------------------------------------------------------------------------------------------------------------------------------------------------------------------------------------|------------------------------------------------------------------------------------------------------------------------------|---------------------------------------------------------------------------------------------------------------------------------------------------------------------------------------------------------------------------------------------------------------------------------------------------------------------------------------------------------------------------------------------------------------------------------------------------------------------------------------------------------------------|--------------------------------|-----------------------------------------------------------------------------------------------------------------------------------------------------------------------------------------------------------------------------|--------------------------------|
| Country, date                   | 3 Continents (Europe, America, Asia), 2013-2015                                                                                                                                                                                                                                                                                |                                                                                                                              | 3 Continents (Europe, America, Asia), 2015-2017                                                                                                                                                                                                                                                                                                                                                                                                                                                                     |                                | South Korea, 2015-2018                                                                                                                                                                                                      |                                |
| Study design                    | Multicenter, randomized, open label trial                                                                                                                                                                                                                                                                                      |                                                                                                                              | Multicenter, randomized, open label trial                                                                                                                                                                                                                                                                                                                                                                                                                                                                           |                                | Multicenter, randomized, unblended trial                                                                                                                                                                                    |                                |
| Treatment                       | 23-month ticagrelor monotherapy after 1-month DAPT                                                                                                                                                                                                                                                                             | 12-month DAPT (aspirin and either ticagrelor for ACS or clopidogrel for stable CAD) followed by 12-month aspirin monotherapy | 12-month ticagrelor monotherapy after 3-month DAPT                                                                                                                                                                                                                                                                                                                                                                                                                                                                  | Ticagrelor-based 15-month DAPT | 9-month ticagrelor monotherapy after 3-month DAPT                                                                                                                                                                           | Ticagrelor-based 12-month DAPT |
| No of patients                  | 2283                                                                                                                                                                                                                                                                                                                           | 2287                                                                                                                         | 1158                                                                                                                                                                                                                                                                                                                                                                                                                                                                                                                | 1184                           | 735                                                                                                                                                                                                                         | 738                            |
| Population                      | Patients undergoing PCI with uniform use of Biolimus A9-eluting stents and bivalirudin                                                                                                                                                                                                                                         |                                                                                                                              | Patients who underwent successful PCI (excluding STEMI) with at least 1 locally approved drug-eluting stent and in whom the treating clinician intended to discharge on regimen of ticagrelor plus aspirin                                                                                                                                                                                                                                                                                                          |                                | ACS patients treated with ultrathin bioresorbable polymer sirolimus-eluting stents                                                                                                                                          |                                |
| Follow up duration, months      | 24                                                                                                                                                                                                                                                                                                                             |                                                                                                                              | 12 (i.e., 15 months after the index procedure)                                                                                                                                                                                                                                                                                                                                                                                                                                                                      |                                | 12                                                                                                                                                                                                                          |                                |
| Primary outcome                 | Composite of all-cause death or new Q-wave myocardial infarction                                                                                                                                                                                                                                                               |                                                                                                                              | BARC type 2, 3 or 5 bleeding                                                                                                                                                                                                                                                                                                                                                                                                                                                                                        |                                | MACCE (composite of all-cause death, myocardial infarction, stent thrombosis, stroke, or target vessel revascularization)                                                                                                   |                                |
| Complex PCI                     | Multivessel PCI, $\geq 3$ stents implanted, $\geq 3$ lesions treated, bifurcation PCI with $\geq 2$ stents, total stent length $> 60$ mm**                                                                                                                                                                                     |                                                                                                                              | 3 vessels treated, $\geq 3$ lesions treated, total stent length $> 60$ mm, bifurcation with 2 stents implanted, use of any atherectomy device, left main as target vessel, surgical bypass graft or chronic total occlusion as target lesions                                                                                                                                                                                                                                                                       |                                | Number of stents implanted $\geq 3$ , total stent length $> 60$ mm, complex procedure defined as chronic total occlusion, left main occlusion, bifurcation PCI with 2 stents, history of diabetes or chronic kidney disease |                                |
| Definition of bleeding endpoint | BARC                                                                                                                                                                                                                                                                                                                           |                                                                                                                              | BARC                                                                                                                                                                                                                                                                                                                                                                                                                                                                                                                |                                | TIMI                                                                                                                                                                                                                        |                                |
| Inclusion criteria              | Age $\geq 18$ years; patients with any clinical indication for PCI; presence of one or more coronary artery stenosis of 50% or more in a native coronary artery or in a saphenous venous or arterial bypass conduit suitable for coronary stent implantation in a vessel with a reference vessel diameter of at least 2.25 mm. |                                                                                                                              | Adult patients $\geq 65$ years of age; recent ( $\geq 3$ days) presentation with ACS with clinical stabilization and decreasing cardiac enzymes; established vascular disease defined as previous MI, documented PAD or CAD/PAD revascularization; diabetes mellitus treated with medications (oral hypoglycemic, subcutaneous injection of insulin); CKD defined as an estimated glomerular filtration rate $< 60$ ml/min/1.73m <sup>2</sup> or creatinine clearance $< 60$ ml/min; multivessel CAD; target lesion |                                | Age $\geq 19$ years; patients who received bioresorbable polymer sirolimus-eluting stent implantation to treat ACS; provision of informed consent                                                                           |                                |

requiring total stent length >30 mm; SYNTAX score  $\geq 23$ ; bifurcation lesions with Medina X,X,1 classification requiring at least 2 stents; left main ( $\geq 50\%$ ) or proximal left anterior descending artery ( $\geq 70\%$ ) lesion; calcified target lesion requiring atherectomy.

#### Exclusion criteria

Known intolerance to aspirin, P2Y<sub>12</sub> receptor antagonists, bivalirudin, stainless steel or biolimus; known intake of a strong cytochrome P3A4 inhibitor (eg, ketoconazole, clarithromycin, nefazodone, ritonavir, and atazanavir), as coadministration may lead to a substantial increase in exposure to ticagrelor; use of fibrinolytic therapy within 24 hours of PCI; known severe hepatic impairment; planned CABG as a staged procedure (hybrid) within 12 months of the index procedure; planned surgery within 12 months of PCI unless DAPT is maintained throughout the peri-surgical period; need for oral anti-coagulation therapy; PCI for a priori known stent thrombosis; known overt major bleeding; known history of intracranial hemorrhage; known stroke from ischemic or unknown cause within last 30 days; known pregnancy at time of randomization; inability to provide informed consent; currently participating in another trial before reaching primary endpoint

Under 18 years of age; contraindication to aspirin; contraindication to ticagrelor; planned surgery within 90 days; planned coronary revascularization (surgical or percutaneous) within 90 days; need for chronic oral anticoagulation; prior stroke; dialysis-dependent renal failure; active bleeding or extreme-risk for major bleeding (e.g. active peptic ulcer disease, gastrointestinal pathology with a raised risk for bleeding, malignancies with a raised risk for bleeding); emergent or salvage PCI or STEMI presentation; liver cirrhosis; life expectancy < 1 year; unable or unwilling to provide informed consent; women of child bearing potential (as determined by hospital standard of care); fibrinolytic therapy within 24 hours of index PCI; concomitant therapy with a strong cytochrome P-450 3A inhibitor or inducer; platelet count < 100,000 mm<sup>3</sup>; requiring ongoing treatment with aspirin > 325 mg daily

Age >80 years; increased risk of bleeding (any prior event of hemorrhagic stroke; ischemic stroke, dementia, or impairment of central nervous system within a year; traumatic brain injury or brain surgery within the past 6 months; known intracranial tumor; documented or suspected aortic dissection; internal bleeding within the past 6 weeks; active bleeding or bleeding diathesis; anemia (hemoglobin  $\leq 8$  g/dL) or thrombocytopenia (platelet count < 100,000/ $\mu$ L); major surgery or traumatic injury resulting in any impairment of physical activity within the past 3 weeks); need for oral anticoagulation therapy; current or potential pregnancy; life expectancy <1 year; currently treated with strong cytochrome P4503A4 inhibitors; moderate to severe hepatic dysfunction (Child-Pugh class B or C); increased risk of bradycardia-related symptoms

| MI                       | Third Universal Definition |             | Third Universal Definition |    | Third Universal Definition after discharge |             |
|--------------------------|----------------------------|-------------|----------------------------|----|--------------------------------------------|-------------|
| Stable CAD, n(%)         | 1174 (51.4)                | 1175 (51.4) | NA                         | NA | 0 (0)                                      | 0 (0)       |
| ACS, n (%)               | 1109 (48.6)                | 1112 (48.6) | NA                         | NA | 735 (100)                                  | 738 (100)   |
| Age, years, mean (SD)    | 65.3 (10.3)                | 65.2 (10.1) | 66.0 (10.4)                |    | 62.9 (10.3)                                | 63.0 (10.6) |
| Men, n (%)               | 1786 (78.2)                | 1809 (2287) | 1844 (78.7)                |    | 560 (76.2)                                 | 572 (77.5)  |
| Hypertension, n (%)      | 1698 (74.4)                | 1664 (72.8) | 1667 (71.2)                |    | 441 (60.0)                                 | 449 (60.8)  |
| Dyslipidemia, n (%)      | 1545 (67.7)                | 1583 (69.2) | 1362 (58.2)                |    | 468 (63.7)                                 | 458 (62.1)  |
| CKD, n (%)               | 322 (14.1)                 | 319 (13.9)  | 405 (18.1)                 |    | 292 (39.7)                                 | 328 (44.4)  |
| Diabetes mellitus, n (%) | 627 (27.5)                 | 573 (25.1)  | 866 (37)                   |    | 418 (56.9)                                 | 417 (56.5)  |

ACS: acute coronary syndrome; BARC: bleeding academic research consortium; CABG: coronary artery bypass grafting; CAD: coronary artery disease; CKD: chronic kidney disease; DAPT: dual antiplatelet therapy; MACCE: major adverse cardiac and cerebrovascular events; NA: not available; PAD: peripheral artery disease; PCI: percutaneous coronary intervention; STEMI: ST-segment elevation myocardial infarction; TIMI: Thrombolysis in Myocardial Infarction

\*\*Multivessel PCI was defined as PCI performed to treat two or three separate major coronary territories. An isolated left main lesion was classified as two-vessel disease in the presence of right dominance and three vessel disease in the presence of left dominance.

**Table S2: Results of Egger test**

| Endpoint              | P value |
|-----------------------|---------|
| Myocardial Infarction | 0.41    |
| Ischemic stroke       | NA      |
| Stent thrombosis      | NA      |
| Cardiovascular death  | NA      |
| All-cause death       | 0.51    |
| Major bleeding        | 0.0005  |
| All bleeding          | NA      |

NA: not available

**Table S3: Sensitivity analysis excluding the TICO trial**

| <b>Endpoint</b>       | <b>IRR (95% CI)</b> | <b>P value</b> |
|-----------------------|---------------------|----------------|
| Myocardial Infarction | 0.83 (0.54-1.27)    | 0.3890         |
| Ischemic stroke       | NA                  | NA             |
| Stent thrombosis      | NA                  | NA             |
| Cardiovascular death  | NA                  | NA             |
| All-cause death       | 0.59 (0.35-1.01)    | 0.0535         |
| Major bleeding        | 0.56 (0.36-0.87)    | 0.0090         |
| All bleeding          | NA                  | NA             |

**CI: confidence interval; IRR: incidence rate ratio**

**Figure S1:** Risk of bias assessment by Rob2 tool for randomized controlled trials

|       |                | Risk of bias domains                                                              |                                                                                    |                                                                                     |                                                                                     |                                                                                     |                                                                                     |
|-------|----------------|-----------------------------------------------------------------------------------|------------------------------------------------------------------------------------|-------------------------------------------------------------------------------------|-------------------------------------------------------------------------------------|-------------------------------------------------------------------------------------|-------------------------------------------------------------------------------------|
|       |                | D1                                                                                | D2                                                                                 | D3                                                                                  | D4                                                                                  | D5                                                                                  | Overall                                                                             |
| Study | GLOBAL LEADERS |  |  |  |  |  |  |
|       | TWILIGHT       |  |  |  |  |  |  |
|       | TICO           |  |  |  |  |  |  |

Domains:

D1: Bias arising from the randomization process.

D2: Bias due to deviations from intended intervention.

D3: Bias due to missing outcome data.

D4: Bias in measurement of the outcome.

D5: Bias in selection of the reported result.

Judgement

 Some concerns

 Low



**Figure S2:** Funnel plots for the pooled analysis of studies comparing ticagrelor monotherapy after short dual antiplatelet therapy vs standard dual antiplatelet therapy in complex percutaneous coronary interventions for the endpoint of myocardial infarction, ischemic stroke, stent thrombosis, cardiovascular death, all-cause death, major bleeding, any bleeding.

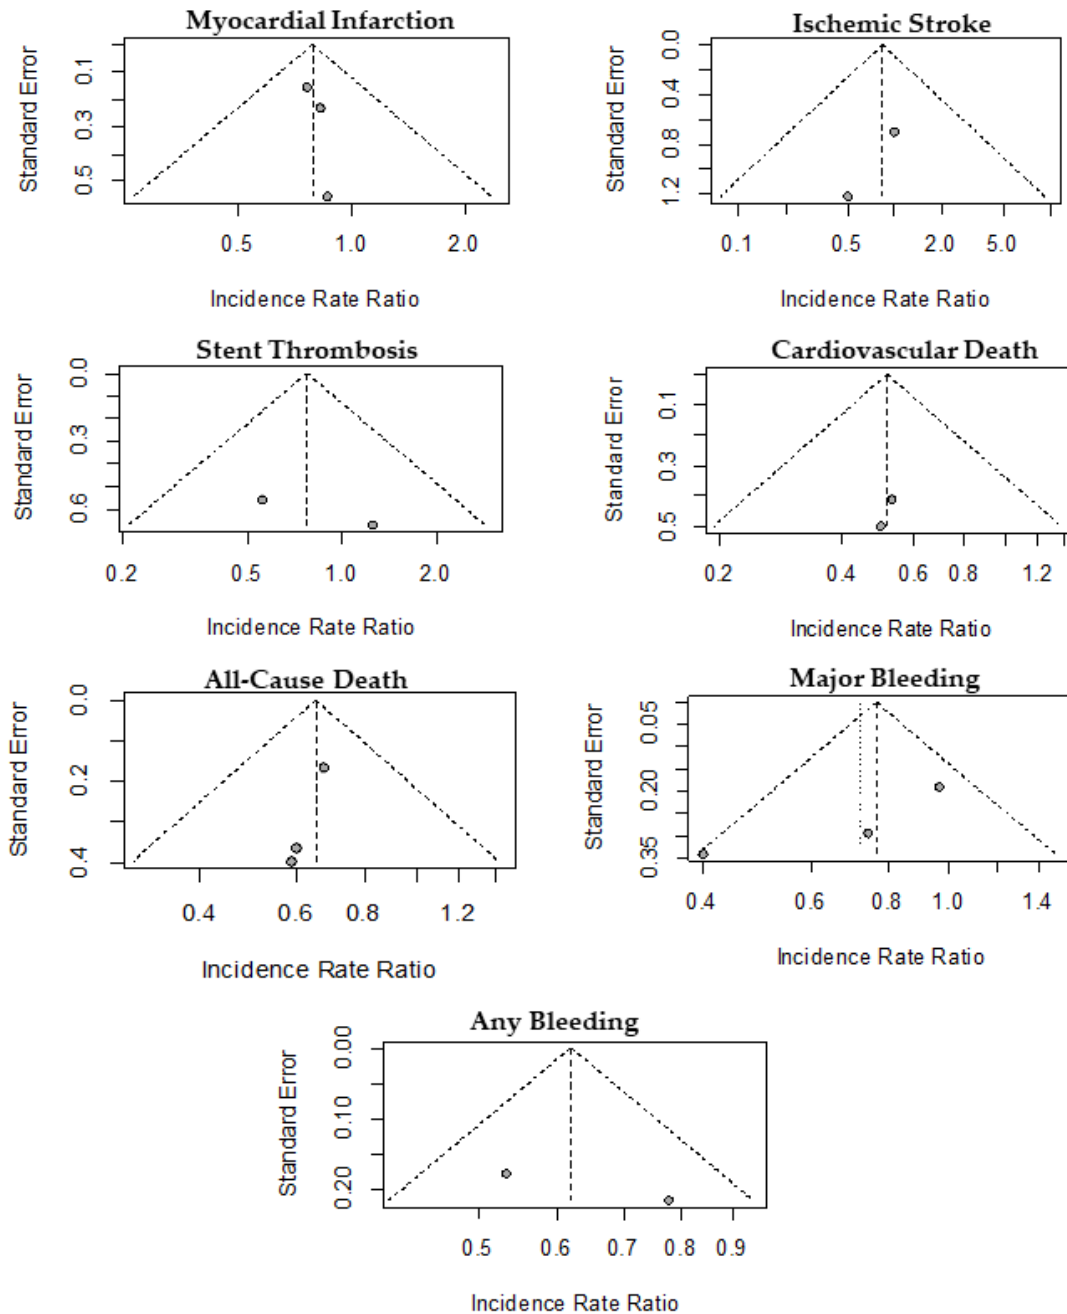

Supplement: s1 [file s1]
